# Supplementary material
Source: ML conference proceedings conference paper supplement (https://proceedings.neurips.cc/paper_files/paper/2023/hash/2c28efa5a86dca4b603a36c08f49f240-Abstract.html)
Supplement: Supplementary file 1 [file 2c28efa5a86dca4b603a36c08f49f240-Supplemental-Conference.pdf]

## 556 Overview of the Appendix

557 The Appendix is organized as follows:

- 558 • Appendix A introduces the general experimental setup.
- 559 • Appendix B introduces the details of dynamic sparse training.
- 560 • Appendix C shows detailed algorithms, i.e., DDA,  $\text{ADAPT}_{\text{relax}}$ , and  $\text{ADAPT}_{\text{strict}}$ .
- 561 • Appendix D shows the BR evolution during training for  $\text{ADAPT}$ .
- 562 • Appendix E shows additional results, including IS and FID of test sets of the main paper.
- 563 • Appendix F shows detailed FLOPs comparisons of sparse training methods.

## 564 A Experimental setup

565 In this section, we explain the training details used in our experiments. Our code is mainly based on  
566 the original code of ITOP [48] and GAN ticket [8].

### 567 A.1 Architecture details

568 We use ResNet-32 [25] for the CIFAR-10 dataset and ResNet-48 for the STL-10 dataset. See Table 4  
569 and Table 5 for detailed architectures. We apply spectral normalization for all fully-connected layers  
570 and convolutional layers of the discriminators.

571 For BigGAN architecture, we use the implementation used in DiffAugment [82].<sup>2</sup>

### 572 A.2 Datasets

573 We use the training set of CIFAR-10, the unlabeled partition of STL-10, and the training set of  
574 TinyImageNet for GAN training. Training images are resized to  $32 \times 32$ ,  $48 \times 48$ ,  $64 \times 64$  for  
575 CIFAR-10, STL-10, and TinyImageNet datasets, respectively. Augmentation methods for both  
576 datasets are random horizontal flip and per-channel normalization.

### 577 A.3 Training hyperparameters

578 **SNGAN on the CIFAR-10 and STL-10 datasets.** We use a learning rate of  $2 \times 10^{-4}$  for both  
579 generators and discriminators. The discriminator is updated five times for every generator update.  
580 We adopt Adam optimizer with  $\beta_1 = 0$  and  $\beta_2 = 0.9$ . The batch size of the discriminator and the  
581 generator is set to 64 and 128, respectively. Hinge loss is used following [6, 8]. We use exponential  
582 moving average (EMA) [78] with  $\beta = 0.999$ . The generator is trained for a total of 100k iterations.

583 **BigGAN on the CIFAR-10 dataset.** We use a learning rate of  $2 \times 10^{-4}$  for both generators and  
584 discriminators. The discriminator is updated four times for every generator update. We adopt Adam  
585 optimizer with  $\beta_1 = 0$  and  $\beta_2 = 0.999$ . The batch size of both the discriminator and the generator  
586 is set to 50. Hinge loss is used following [6, 76]. We use EMA with  $\beta = 0.9999$ . The generator is  
587 trained for a total of 200k iterations.

588 **BigGAN on the TinyImageNet dataset.** We use DiffAug [82] to augment the input. The learning  
589 rate of the discriminator and the generator are set to  $4 \times 10^{-4}$  and  $1 \times 10^{-4}$ , respectively. The  
590 discriminator is updated one time for every generator update. We adopt Adam optimizer with  $\beta_1 = 0$   
591 and  $\beta_2 = 0.999$ . The batch size of both the discriminator and the generator is set to 256. Hinge loss  
592 is used following [6, 76]. We use EMA with  $\beta = 0.9999$ . The generator is trained for a total of 200k  
593 iterations.

### 594 A.4 Evaluation metric

595 **SNGAN on the CIFAR-10 and the STL-10 datasets.** We compute Fréchet inception distance  
596 (FID) and Inception score (IS) for 50k generated images every 5000 iterations. Best FID and IS are

---

<sup>2</sup><https://github.com/mit-han-lab/data-efficient-gans/tree/master/DiffAugment-biggan-cifar>.

597 reported. For the CIFAR-10 dataset, we report both FID for the training set and test set, whereas, for  
598 the STL-10 dataset, we report the FID of the unlabeled partition.

599 **BigGAN on the CIFAR-10 and the TinyImageNet dataset.** We compute Fréchet inception distance  
600 (FID) and Inception score (IS) for 10k generated images every 5000 iterations. Best FID and IS are  
601 reported.

## 602 B Dynamic sparse training details

### 603 B.1 How the generator performs DST

604 In this section, we explain how the generator performs DST below. Note that the generator performs  
605 the same for SDST and ADAPT.

606 **Sparsity distribution at initialization.** Following RigL and ITOP [15, 48], only parameters of  
607 fully connected and convolutional layers will be pruned. At initialization, we use the commonly  
608 adopted *Erdős-Rényi-Kernel* (ERK) strategy [15, 13, 48] to allocate higher sparsity to larger layers.  
609 Specifically, the sparsity of convolutional layers  $l$  is scaled with  $1 - \frac{n^{l-1} + n^l + w^l + h^l}{n^{l-1}n^l w^l h^l}$ , where  $n^l$  denotes  
610 the number of channels of layer  $l$  while  $w^l$  and  $h^l$  are the widths and the height of the corresponding  
611 kernel in that layer. For fully connected layers, *Erdős-Rényi* (ER) strategy is used, where the sparsity  
612 is scaled with  $1 - \frac{n^{l-1} + n^l}{n^{l-1}n^l}$ .

613 **Update schedule.** The update schedule controls how many connections are adjusted per DST  
614 operation. It can be specified by the number of training iterations between sparse connectivity updates  
615  $\Delta T_G$ , the initial fraction of connections adjusted  $\gamma$ , and decaying schedule  $f_{\text{decay}}(\gamma, T)$  for  $\gamma$ .

616 **Drop and grow.** After  $\Delta T_G$  training iterations, we update the mask  $m_G$  by dropping/pruning  
617  $f_{\text{decay}}(\gamma, T) |\theta_G| d_G$  number of connections with the lowest magnitude, where  $|\theta_G|$ ,  $d_G$  are the  
618 number of parameters and target density for the generator,  $f_{\text{decay}}(\gamma, T)$  is the update schedule. Right  
619 after the connection drop, we regrow the same amount of connections.

620 For the growing criterion, we test both random growth  $\blacklozenge$  SET [56, 48] and gradient-based growth  $\bullet$   
621 RIGL [15]. Concretely, gradient-based methods find newly-activated connections  $\theta$  with the highest  
622 gradient magnitude  $|\frac{\partial \mathcal{L}}{\partial \theta}|$ , while random-based methods explore connections in a random fashion. All  
623 the newly-activated connections are set to 0. One thing that should be noticed is that while previous  
624 works consider layer-wise connections drop and growth, we grow and drop connections globally as it  
625 grants more flexibility to the DST method.

626 **EMA for sparse GAN.** EMA [78] is well-known for its ability to alleviate the non-convergence  
627 of GAN. We also implement EMA for sparse GAN training. Specifically, we zero out the moving  
628 average of dropped weights whenever there is a mask change.

### 629 B.2 DST hyperparameters for the generator

630 We use the same hyper-parameters for SDST and ADAPT. The initial  $\gamma$  is set to 0.5, and we use a  
631 cosine annealing function  $f_{\text{decay}}$  following RigL and ITOP.

632 **SNGAN on the CIFAR-10 and the STL-10 datasets.** The connection update frequency of the  
633 generator  $\Delta T_G$  is set to 500 and 1000 for the CIFAR-10 dataset and STL-10 dataset, respectively.

634 **BigGAN on the CIFAR-10 and the TinyImageNet dataset.** The connection update frequency of  
635 the generator  $\Delta T_G$  is set to be 1000.

### 636 B.3 Density dynamic adjust (DDA) hyper-parameters

637 In this section, we provide hyper-parameters used in subsection 5.3. We set  $d_D = 2000$ ,  $\Delta T_D = 0.05$ ,  
638  $[B_-, B_+] = [0.5, 0.65]$ . Time-averaged BR over 1000 iterations is used as the indicator.

### 639 B.4 DST hyperparameters for the discriminator in ADAPT

640 We use a constant BR interval  $[B_-, B_+] = [0.45, 0.55]$  for SNGAN experiments and BigGAN on the  
641 CIFAR-10 dataset. We set the BR interval  $[B_-, B_+] = [0.3, 0.4]$  for BigGAN on the TinyImageNet

Table 4: ResNet architecture for CIFAR-10.

| (a) Generator                                   | (b) Discriminator                             |
|-------------------------------------------------|-----------------------------------------------|
| $z \in \mathbb{R}^{128} \sim \mathcal{N}(0, I)$ | image $x \in [-1, 1]^{32 \times 32 \times 3}$ |
| dense, $4 \times 4 \times 256$                  | ResBlock down 128                             |
| ResBlock up 256                                 | ResBlock down 128                             |
| ResBlock up 256                                 | ResBlock down 128                             |
| ResBlock up 256                                 | ResBlock down 128                             |
| BN, ReLU, $3 \times 3$ conv, Tanh               | ReLU 0.1                                      |
|                                                 | Global sum pooling                            |
|                                                 | dense $\rightarrow 1$                         |

Table 5: ResNet architecture for STL-10.

| (a) Generator                                   | (b) Discriminator                             |
|-------------------------------------------------|-----------------------------------------------|
| $z \in \mathbb{R}^{128} \sim \mathcal{N}(0, I)$ | image $x \in [-1, 1]^{48 \times 48 \times 3}$ |
| dense, $6 \times 6 \times 512$                  | ResBlock down 64                              |
| ResBlock up 256                                 | ResBlock down 128                             |
| ResBlock up 128                                 | ResBlock down 256                             |
| ResBlock up 64                                  | ResBlock down 512                             |
| BN, ReLU, $3 \times 3$ conv, Tanh               | ResBlock down 1024                            |
|                                                 | ReLU 0.1                                      |
|                                                 | Global avg pooling                            |
|                                                 | dense $\rightarrow 1$                         |

642 since it uses DiffAug. Time-averaged BR over 1000 iterations is used as the indicator. Density  
 643 increment  $\Delta d$  is set to be 0.05, 0.025, and 0.05 for SNGAN (CIFAR-10), SNGAN (STL-10), and  
 644 BigGAN (CIFAR-10), respectively. We use the same setting used in subsection B.2 for the generator.

645 **Hyper-parameters for ADAPT<sub>relax</sub>.** The density update frequency of the discriminator  $\Delta T_D$  is 1000,  
 646 2000, 5000, and 10000 iterations for SNGAN (CIFAR-10), SNGAN (STL-10), BigGAN (CIFAR-10),  
 647 and BigGAN (TinyImageNet), respectively.

648 **Hyper-parameters for ADAPT<sub>strict</sub>.** The density/connections update frequency of the discriminator  
 649  $\Delta T_D$  is 2000, 2000, 5000, and 10000 iterations for SNGAN (CIFAR-10), SNGAN (STL-10),  
 650 BigGAN (CIFAR-10), and BigGAN (TinyImageNet), respectively.

651 Note that we compute BR for every iteration to visualize the BR evolution, whereas one should note  
 652 that such computational cost can be greatly decreased if BR is computed every few iterations.

## 653 C Algorithms

654 In this section, we present the detailed algorithms for DDA, ADAPT<sub>relax</sub>, and ADAPT<sub>strict</sub>.

### 655 C.1 Dynamic adjust algorithm

We first present DDA in Algorithm 1.

---

**Algorithm 1** Dynamic density adjust (DDA) for the discriminator.

---

**Require:** Generator  $G$ , discriminator  $D$ , BR upper bound  $B_+$  and lower bound  $B_-$ , DA interval  $\Delta T_D$ , density  
 increment  $\Delta d$ , current training iteration  $t$ .

- 1: **if**  $t \bmod \Delta T_D == 0$  **then**
  - 2:   Compute time-averaged BR with Equation 3
  - 3:   **if**  $\text{BR} > B_+$  **then**
  - 4:     Increase the density of discriminator from  $d_D$  to  $d_D + \Delta d$ .
  - 5:   **else if**  $\text{BR} < B_-$  **then**
  - 6:     Decrease the density of discriminator from  $d_D$  to  $d_D - \Delta d$ .
  - 7:   **end if**
  - 8: **end if**
- 

656

### 657 C.2 Relaxed balanced dynamic sparse training algorithm

658 Details of ADAPT<sub>relax</sub> algorithm is presented in Algorithm 2.

### 659 C.3 Strict balanced dynamic sparse training algorithm

660 Details of ADAPT<sub>strict</sub> algorithm is presented in Algorithm 3.

---

**Algorithm 2** Relaxed balanced dynamic sparse training (ADAPT<sub>relax</sub>) for GANs.

---

**Require:** Generator  $G$ , discriminator  $D$ , total number of training iterations  $T$ , number of training steps for discriminator in each iteration  $N$ , discriminator adjustment interval  $\Delta T_D$ , DST interval for the generator  $\Delta T_G$ , density increment  $\Delta d$ , target generator density  $d_G$ , BR upper bound  $B_+$  and lower bound  $B_-$ .

- 1: Set initial discriminator density  $d_D = d_G$
- 2: **for**  $t$  in  $[1, \dots, T]$  **do**
- 3:   **for**  $n$  in  $[1, \dots, N]$  **do**
- 4:     Compute the loss of discriminator  $\mathcal{L}_D(\theta_D)$
- 5:      $\mathcal{L}_D(\theta_D).backward()$
- 6:   **end for**
- 7:   **if**  $t \bmod \Delta T_D == 0$  **then**
- 8:     Compute the loss of generator  $\mathcal{L}_G(\theta_G)$
- 9:      $\mathcal{L}_G(\theta_G).backward()$
- 10:    Compute time-averaged BR with Equation 3
- 11:    **if**  $BR > B_+$  **then**
- 12:     Increase the density of discriminator from  $d_D$  to  $\min(100\%, d_D + \Delta d)$ .
- 13:    **else if**  $BR < B_-$  **then**
- 14:     Decrease the density of discriminator from  $d_D$  to  $\max(0\%, d_D - \Delta d)$ .
- 15:    **end if**
- 16:   **end if**
- 17:   **if**  $t \bmod \Delta T_G == 0$  **then**
- 18:     Apply DST to  $G$
- 19:   **end if**
- 20: **end for**

---

---

**Algorithm 3** Strict balanced dynamic sparse training (ADAPT<sub>strict</sub>) for GANs.

---

**Require:** Generator  $G$ , discriminator  $D$ , total number of training iterations  $T$ , number of training steps for discriminator in each iteration  $N$ , given maximal density of discriminator  $d_{\max}$ , discriminator adjustment interval  $\Delta T_D$ , DST interval for the generator  $\Delta T_G$ , density increment  $\Delta d$ , target generator density  $d_G$ , BR upper bound  $B_+$  and lower bound  $B_-$ .

- 1: Set initial discriminator density  $d_D = d_G$
- 2: **for**  $t$  in  $[1, \dots, T]$  **do**
- 3:   **for**  $n$  in  $[1, \dots, N]$  **do**
- 4:     Compute the loss of discriminator  $\mathcal{L}_D(\theta_D)$
- 5:      $\mathcal{L}_D(\theta_D).backward()$
- 6:   **end for**
- 7:   **if**  $t \bmod \Delta T_D == 0$  **then**
- 8:     Compute the loss of generator  $\mathcal{L}_G(\theta_G)$
- 9:      $\mathcal{L}_G(\theta_G).backward()$
- 10:    Compute time-averaged BR with Equation 3
- 11:    **if**  $BR > B_+$  and  $d_D < d_{\max}$  **then**
- 12:     Increase the density of discriminator from  $d_D$  to  $\min(d_{\max}, d_D + \Delta d)$ .
- 13:    **else if**  $BR > B_+$  and  $d_D == d_{\max}$  **then**
- 14:     Apply DST to  $D$
- 15:    **else if**  $BR < B_-$  **then**
- 16:     Decrease the density of discriminator from  $d_D$  to  $\max(0\%, d_D - \Delta d)$ .
- 17:    **end if**
- 18:   **end if**
- 19:   **if**  $t \bmod \Delta T_G == 0$  **then**
- 20:     Apply DST to  $G$
- 21:   **end if**
- 22: **end for**

---

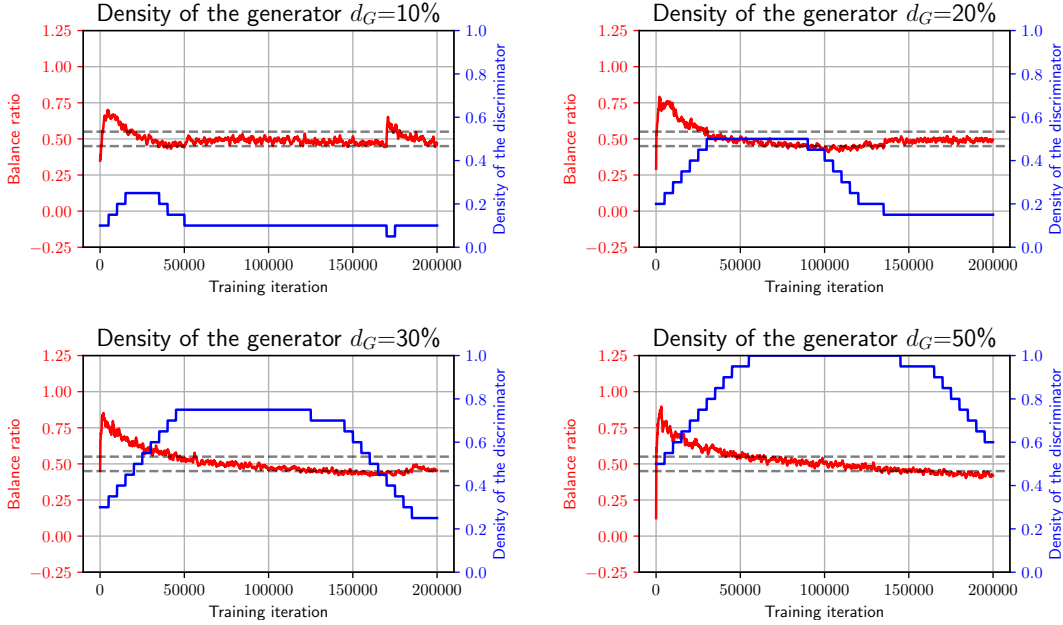

Figure 5: Balance ratio and discriminator density evolution during training for  $\text{ADAPT}_{\text{relax}}$  on BigGAN (CIFAR-10). Dashed lines represent BR values of 0.45 and 0.55.

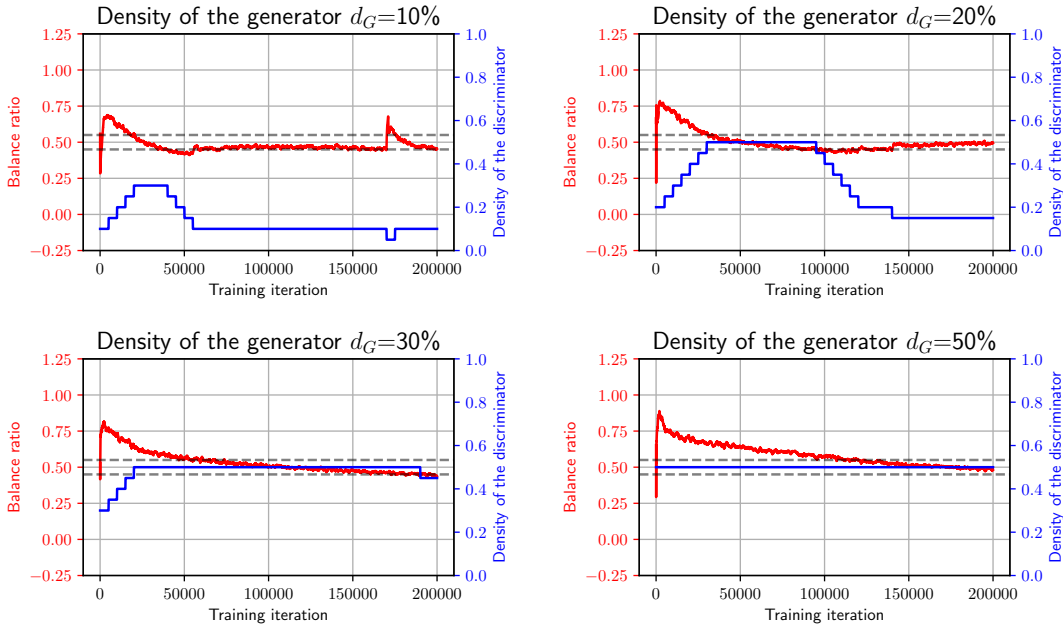

Figure 6: Balance ratio and discriminator density evolution during training for  $\text{ADAPT}_{\text{strict}}$  on BigGAN (CIFAR-10). Dashed lines represent BR values of 0.45 and 0.55.

661 **D ADAPT balance ratio evolution**

662 In this section, we show that ADAPT methods are able to maintain a BR throughout training. We  
 663 show the time evolution of BR and discriminator density for BigGAN on the CIFAR-10 dataset.

664 Results of  $\text{ADAPT}_{\text{relax}}$  and  $\text{ADAPT}_{\text{strict}}$  are shown in Figure 5 and Figure 6. It clearly illustrates the  
 665 ability of ADAPT to keep the BR controlled during GAN training.

Table 6: FID ( $\downarrow$ ) of different sparse training methods along with post-hoc pruning baseline **with no constraint on the density of the discriminator**. Best results are in **bold**; second-best results are underlined.

| Dataset                          | CIFAR-10 (SNGAN) |              |              |              | STL-10 (SNGAN) |              |              |              | CIFAR-10 (BigGAN) |             |             |             |
|----------------------------------|------------------|--------------|--------------|--------------|----------------|--------------|--------------|--------------|-------------------|-------------|-------------|-------------|
| Generator density                | 10%              | 20%          | 30%          | 50%          | 10%            | 20%          | 30%          | 50%          | 10%               | 20%         | 30%         | 50%         |
| (Dense Baseline)                 | 10.74            |              |              |              | 29.71          |              |              |              | 8.11              |             |             |             |
| Post-hoc pruning                 | 20.89            | 14.07        | 12.99        | 11.90        | 57.28          | 37.12        | 31.98        | <b>29.70</b> | 15.44             | 10.84       | 9.65        | 8.77        |
| STATIC-Balance                   | 26.75            | 19.04        | 15.05        | 12.24        | 48.18          | 44.67        | 41.73        | 37.68        | 16.98             | 12.81       | 10.33       | 8.47        |
| STATIC-Strong                    | 26.79            | 19.65        | 14.38        | 11.91        | 52.48          | 43.85        | 42.06        | 37.47        | 23.48             | 14.26       | 11.19       | 8.64        |
| $\blacklozenge$ SDST-Balance-SET | 26.23            | 17.79        | 13.21        | 11.79        | 56.41          | 46.58        | 39.93        | 30.37        | 12.41             | 9.87        | 9.13        | <b>8.01</b> |
| $\blacklozenge$ SDST-Strong-SET  | <u>16.49</u>     | <u>13.36</u> | <b>11.68</b> | <u>10.68</u> | 67.37          | 49.96        | 37.99        | 31.08        | 18.94             | 9.64        | 8.75        | 8.36        |
| $\bullet$ SDST-Balance-RigL      | 27.06            | 16.36        | 14.00        | 12.28        | 43.08          | 33.90        | 31.83        | 30.30        | 12.45             | 9.42        | 8.86        | <u>8.03</u> |
| $\bullet$ SDST-Strong-RigL       | 17.02            | 13.86        | 12.51        | 11.35        | 53.65          | <u>33.25</u> | <b>31.41</b> | 30.18        | <u>10.58</u>      | <u>9.11</u> | <u>8.69</u> | 8.33        |
| ADAPT <sub>relax</sub> (Ours)    | <b>14.19</b>     | <b>13.19</b> | <u>12.38</u> | <b>10.60</b> | <b>35.98</b>   | <b>33.06</b> | <u>31.71</u> | <u>29.96</u> | <b>10.19</b>      | <b>8.56</b> | <b>8.36</b> | 8.22        |

## 666 E More experiment results

### 667 E.1 IS and FID for the CIFAR-10 dataset

668 In this section, we present corresponding IS scores results for Table 1 and Table 2. The results are  
 669 shown in Table 8 and Table 9, respectively. We also include FID results of CIFAR-10 test set in  
 670 Table 10.

### 671 E.2 Naively applying DST to both the generator and the discriminator

672 In this section, we follow STU-GAN to compare the baseline where applying DST on both generators  
 673 and discriminators. We name it `DST-bothGD`.

674 We test on SNGAN (CIFAR-10) with  $\Delta T_D = 1000$ ,  $\Delta T_G = 500$ , and  $\gamma = 0.5$ . Note that we use the  
 675 balance strategy where  $d_G = d_D$ . The reason is that the strong strategy uses a dense discriminator,  
 676 and it does not make sense to apply DST to a dense network.

677 We show the results in Table 7. It shows that it generates unstable results and consistently performs  
 678 worse than `SDST-Strong`. So we do not compare such baseline in the main body of the paper.

### 679 E.3 Post-hoc pruning baseline

680 In this section, we compare different sparse training methods with post-hoc magnitude pruning [61]  
 681 baseline. Magnitude pruning involves first training a dense generator, then pruning its weights globally  
 682 based on their magnitudes. The pruned generator is then fine-tuned with the dense discriminator.  
 683 We perform additional fine-tuning for 50% of the original total iterations. Results are presented in  
 684 Table 6.

685 Our experimental results clearly demonstrate the advantages of dynamic sparse training over post-  
 686 hoc magnitude pruning. The latter typically requires around 150% normalized training FLOPs,  
 687 while DST methods constantly achieve comparable or better performance with significantly reduced  
 688 computational cost.

## 689 F A detailed comparison of training costs

690 In this section, we include the detailed computational cost of all sparse training methods. More  
 691 specifically, we take into account the density redistribution over different layers in this section.  
 692 Also, we make an assumption that the computational overhead introduced by computing BR can be  
 693 neglected.<sup>3</sup>

694 Here we provide training costs for the **strict** setting in Table 12.

<sup>3</sup>This is true if we compute BR less frequently.

Table 7: FID ( $\downarrow$ ) of different sparse training methods on CIFAR-10 datasets with no constraint on the density of the discriminator. Best results are in **bold**; second-best results are underlined.

| Dataset                          | CIFAR-10     |              |              |              |
|----------------------------------|--------------|--------------|--------------|--------------|
| Generator density                | 10%          | 20%          | 30%          | 50%          |
| (Dense Baseline)                 | 10.74        |              |              |              |
| Static-Balance                   | 26.75        | 19.04        | 15.05        | 12.24        |
| Static-Strong                    | 26.79        | 19.65        | 14.38        | 11.91        |
| $\blacklozenge$ DST-bothGD-SET   | 20.57        | 14.90        | 12.58        | 11.86        |
| $\bullet$ DST-bothGD-RigL        | 31.95        | 17.99        | 13.24        | 12.47        |
| $\blacklozenge$ SDST-Balance-SET | 26.23        | 17.79        | 13.21        | 11.79        |
| $\blacklozenge$ SDST-Strong-SET  | <u>16.49</u> | <u>13.36</u> | <b>11.68</b> | <u>10.68</u> |
| $\bullet$ SDST-Balance-RigL      | 27.06        | 16.36        | 14.00        | 12.28        |
| $\bullet$ SDST-Strong-RigL       | 17.02        | 13.86        | 12.51        | 11.35        |
| ADAPT <sub>relax</sub> (Ours)    | <b>14.19</b> | <b>13.19</b> | <u>12.38</u> | <b>10.60</b> |

Table 8: IS (higher is better) of different sparse training methods. There is no constraint on the density of the discriminator, i.e.,  $d_{\max} = 100\%$ .

| Dataset                          | SNGAN(CIFAR-10) |      |      |      | SNGAN(STL-10) |      |      |      | BigGAN(CIFAR-10) |      |      |      | BigGAN(TinyImageNet) |       |       |       |
|----------------------------------|-----------------|------|------|------|---------------|------|------|------|------------------|------|------|------|----------------------|-------|-------|-------|
| Generator density                | 10%             | 20%  | 30%  | 50%  | 10%           | 20%  | 30%  | 50%  | 10%              | 20%  | 30%  | 50%  | 10%                  | 20%   | 30%   | 50%   |
| (Dense Baseline)                 | 8.48            |      |      |      | 9.16          |      |      |      | 8.99             |      |      |      | 14.65                |       |       |       |
| Static-Balance                   | 7.24            | 7.83 | 8.06 | 8.38 | 7.94          | 8.19 | 8.44 | 8.69 | 7.99             | 8.24 | 8.68 | 8.90 | 10.65                | 12.28 | 13.41 | 13.57 |
| Static-Strong                    | 7.52            | 8.03 | 8.32 | 8.45 | 7.70          | 8.22 | 8.35 | 8.70 | 7.75             | 8.13 | 8.52 | 8.99 | 10.45                | 12.56 | 13.61 | 13.73 |
| $\blacklozenge$ SDST-Balance-SET | 7.28            | 7.89 | 8.22 | 8.38 | 8.43          | 8.92 | 9.26 | 9.31 | 8.62             | 8.67 | 8.82 | 8.98 | 11.75                | 12.60 | 12.30 | 12.21 |
| $\blacklozenge$ SDST-Strong-SET  | 8.37            | 8.54 | 8.57 | 8.60 | 7.65          | 8.53 | 9.39 | 9.21 | 8.16             | 8.78 | 8.85 | 9.06 | 12.75                | 12.84 | 12.46 | 13.73 |
| $\bullet$ SDST-Balance-RigL      | 7.19            | 7.94 | 8.18 | 8.34 | 8.98          | 9.07 | 9.12 | 9.28 | 8.64             | 8.71 | 8.91 | 8.93 | 12.67                | 13.32 | 13.18 | 13.61 |
| $\bullet$ SDST-Strong-RigL       | 8.32            | 8.52 | 8.59 | 8.57 | 8.15          | 9.10 | 9.16 | 9.17 | 8.65             | 8.72 | 8.97 | 9.00 | 13.32                | 13.35 | 13.60 | 14.47 |
| ADAPT <sub>relax</sub> (Ours)    | 8.42            | 8.44 | 8.54 | 8.60 | 9.08          | 9.29 | 9.06 | 9.26 | 8.74             | 9.07 | 8.98 | 9.00 | 13.09                | 13.57 | 13.68 | 15.77 |

Table 9: IS (higher is better) of different sparse training methods. The density of the discriminator is constrained to be lower than  $d_{\max} = 50\%$ .

| Dataset                          | SNGAN(CIFAR-10) |      |      |      | SNGAN(STL-10) |      |      |      | BigGAN(CIFAR-10) |      |      |      | BigGAN(TinyImageNet) |       |       |       |
|----------------------------------|-----------------|------|------|------|---------------|------|------|------|------------------|------|------|------|----------------------|-------|-------|-------|
| Generator density                | 10%             | 20%  | 30%  | 50%  | 10%           | 20%  | 30%  | 50%  | 10%              | 20%  | 30%  | 50%  | 10%                  | 20%   | 30%   | 50%   |
| (Dense Baseline)                 | 8.48            |      |      |      | 9.16          |      |      |      | 8.99             |      |      |      | 14.65                |       |       |       |
| Static-Balance                   | 7.24            | 7.83 | 8.06 | 8.38 | 7.94          | 8.19 | 8.44 | 8.69 | 7.99             | 8.24 | 8.68 | 8.90 | 10.65                | 12.28 | 13.41 | 13.57 |
| Static-Strong                    | 7.85            | 8.14 | 8.31 | 8.38 | 7.89          | 8.22 | 8.38 | 8.69 | 7.75             | 8.03 | 8.52 | 8.90 | 9.99                 | 11.61 | 13.77 | 13.57 |
| $\blacklozenge$ SDST-Balance-SET | 7.28            | 7.89 | 8.22 | 8.38 | 8.43          | 8.92 | 9.26 | 9.31 | 8.62             | 8.67 | 8.82 | 8.98 | 11.75                | 12.60 | 12.30 | 12.21 |
| $\blacklozenge$ SDST-Strong-SET  | 8.33            | 8.53 | 8.40 | 8.38 | 8.50          | 8.77 | 9.46 | 9.26 | 8.55             | 8.77 | 8.84 | 8.98 | 12.00                | 12.87 | 12.16 | 12.21 |
| $\bullet$ SDST-Balance-RigL      | 7.19            | 7.94 | 8.18 | 8.34 | 8.98          | 9.07 | 9.12 | 9.28 | 8.64             | 8.71 | 8.91 | 8.93 | 12.67                | 13.32 | 13.18 | 13.61 |
| $\bullet$ SDST-Strong-RigL       | 8.24            | 8.48 | 8.37 | 8.34 | 8.28          | 9.05 | 9.11 | 9.28 | 8.61             | 8.83 | 8.84 | 8.93 | 12.04                | 12.66 | 13.57 | 13.61 |
| ADAPT <sub>strict</sub> (Ours)   | 8.27            | 8.36 | 8.48 | 8.47 | 8.98          | 9.17 | 9.20 | 9.19 | 8.90             | 8.89 | 8.92 | 9.10 | 13.85                | 13.61 | 14.05 | 14.40 |

Table 10: FID of test set ( $\downarrow$ ) of different sparse training methods on SNGAN (CIFAR-10) dataset. Best results are in **bold**; second-best results are underlined.

| Maximal discriminator density $d_{\max}$ | 100%         |              |              |              | 50%          |              |              |              |
|------------------------------------------|--------------|--------------|--------------|--------------|--------------|--------------|--------------|--------------|
| Generator density                        | 10%          | 20%          | 30%          | 50%          | 10%          | 20%          | 30%          | 50%          |
| (Dense Baseline)                         | 13.32        |              |              |              |              |              |              |              |
| Static-Balance                           | 29.56        | 21.79        | 17.80        | 14.94        | 29.56        | 21.79        | 17.80        | 14.94        |
| Static-Strong                            | 29.50        | 22.45        | 17.12        | 14.58        | 24.62        | 19.43        | 16.32        | 14.94        |
| $\blacklozenge$ SDST-Balance-SET         | 28.84        | 20.31        | 15.95        | 14.35        | 28.84        | 20.31        | 15.95        | <b>14.35</b> |
| $\blacklozenge$ SDST-Strong-SET          | <u>19.16</u> | <u>16.12</u> | <b>14.45</b> | <u>13.50</u> | 18.38        | <b>15.33</b> | <b>14.78</b> | <b>14.35</b> |
| $\bullet$ SDST-Balance-RigL              | 29.77        | 19.02        | 16.68        | 15.05        | 29.77        | 19.02        | 16.68        | 15.05        |
| $\bullet$ SDST-Strong-RigL               | 19.72        | 16.50        | 15.20        | 14.09        | <u>17.92</u> | <u>15.51</u> | 15.52        | 15.05        |
| ADAPT <sub>relax</sub> (Ours)            | <b>16.82</b> | <b>15.85</b> | <u>15.14</u> | <b>13.37</b> | -            | -            | -            | -            |
| ADAPT <sub>strict</sub> (Ours)           | -            | -            | -            | -            | <b>17.19</b> | 15.57        | <u>14.92</u> | <u>14.80</u> |

Table 11: FID of test set ( $\downarrow$ ) of different sparse training methods on BigGAN (CIFAR-10) dataset. Best results are in **bold**; second-best results are underlined.

| Maximal discriminator density $d_{\max}$ | <b>100 %</b> |              |              |              | <b>50 %</b>  |              |              |              |
|------------------------------------------|--------------|--------------|--------------|--------------|--------------|--------------|--------------|--------------|
| Generator density                        | 10%          | 20 %         | 30 %         | 50 %         | 10%          | 20 %         | 30 %         | 50 %         |
| (Dense Baseline)                         | 10.36        |              |              |              |              |              |              |              |
| Static-Balance                           | 19.58        | 15.63        | 13.21        | 10.92        | 19.58        | 15.63        | 13.21        | 10.92        |
| Static-Strong                            | 26.08        | 15.82        | 13.47        | 10.95        | 22.04        | 16.39        | 13.73        | 10.92        |
| ◆ SDST-Balance-SET                       | 14.90        | 12.77        | 11.82        | <b>10.68</b> | 14.90        | 12.77        | 11.82        | <u>10.68</u> |
| ◆ SDST-Strong-SET                        | 21.63        | 11.92        | 11.27        | <u>10.75</u> | 14.53        | <u>11.83</u> | 10.96        | <u>10.68</u> |
| ● SDST-Balance-RigL                      | 14.86        | 12.03        | 11.30        | <b>10.68</b> | 14.86        | <u>12.03</u> | 11.30        | <u>10.68</u> |
| ● SDST-Strong-RigL                       | <u>13.35</u> | <u>11.58</u> | <u>11.00</u> | 10.88        | <u>12.59</u> | 12.03        | <b>10.89</b> | <u>10.68</u> |
| ADAPT <sub>relax</sub> (Ours)            | <b>12.71</b> | <b>11.02</b> | <b>10.62</b> | 10.80        | -            | -            | -            | -            |
| ADAPT <sub>strict</sub> (Ours)           | -            | -            | -            | -            | <b>11.83</b> | <b>11.22</b> | <u>10.92</u> | <b>10.33</b> |

Table 12: Normalized training FLOPs ( $\downarrow$ ) of different sparse training methods. **The density of the discriminator is constrained to be lower than 50%.**

| Dataset                        | CIFAR-10 (SNGAN)               |        |        |        | STL-10 (SNGAN)                 |        |        |        | CIFAR-10 (BigGAN)              |        |        |        | TinyImageNet (BigGAN)          |        |        |        |
|--------------------------------|--------------------------------|--------|--------|--------|--------------------------------|--------|--------|--------|--------------------------------|--------|--------|--------|--------------------------------|--------|--------|--------|
| Generator density              | 10%                            | 20%    | 30%    | 50%    | 10%                            | 20%    | 30%    | 50%    | 10%                            | 20%    | 30%    | 50%    | 10%                            | 20%    | 30%    | 50%    |
| (Dense Baseline)               | 100% ( $2.67 \times 10^{17}$ ) |        |        |        | 100% ( $3.94 \times 10^{17}$ ) |        |        |        | 100% ( $6.81 \times 10^{17}$ ) |        |        |        | 100% ( $9.85 \times 10^{17}$ ) |        |        |        |
| Static-Balance                 | 8.97%                          | 17.08% | 26.25% | 47.25% | 27.30%                         | 47.14% | 59.22% | 73.35% | 9.79%                          | 19.02% | 28.66% | 49.03% | 23.25%                         | 44.87% | 60.91% | 79.29% |
| Static-Strong                  | 30.89%                         | 33.58% | 37.17% | 47.25% | 70.65%                         | 71.48% | 72.14% | 73.35% | 42.66%                         | 43.69% | 45.10% | 49.03% | 41.52%                         | 55.03% | 66.29% | 79.29% |
| ◆ SDST-Balance-SET             | 9.78%                          | 18.91% | 28.35% | 48.44% | 27.55%                         | 47.60% | 60.17% | 75.38% | 10.35%                         | 20.12% | 29.96% | 49.82% | 21.13%                         | 37.06% | 48.83% | 65.58% |
| ◆ SDST-Strong-SET              | 31.87%                         | 35.51% | 39.53% | 48.44% | 70.95%                         | 71.97% | 73.07% | 75.38% | 43.25%                         | 44.80% | 46.42% | 49.82% | 39.28%                         | 47.31% | 54.11% | 65.58% |
| ● SDST-Balance-RigL            | 10.71%                         | 17.43% | 25.66% | 43.56% | 29.51%                         | 50.41% | 63.34% | 79.03% | 9.92%                          | 19.30% | 28.90% | 48.31% | 24.97%                         | 43.86% | 57.26% | 76.75% |
| ● SDST-Strong-RigL             | 31.22%                         | 33.93% | 36.63% | 43.56% | 72.95%                         | 75.05% | 76.42% | 79.03% | 42.80%                         | 44.08% | 45.37% | 48.31% | 43.76%                         | 53.71% | 63.05% | 76.75% |
| ADAPT <sub>strict</sub> (Ours) | 24.23%                         | 27.55% | 31.70% | 37.83% | 50.91%                         | 70.18% | 75.99% | 80.68% | 10.32%                         | 23.69% | 31.54% | 33.83% | 34.42%                         | 51.68% | 62.34% | 77.46% |
